# Supplementary material for: Antimicrobial activity of bismuth subsalicylate on Clostridium difficile, Escherichia coli O157:H7, norovirus, and other common enteric pathogens
Source: PubMed Central journal article supplement — Gut Microbes. 2015 Apr 22;6(2):93–100. doi: 10.1080/19490976.2015.1008336 (PMC4615802; doi:10.1080/19490976.2015.1008336), 2015-04-22
Supplement: kgmi-06-02-1008336-s001.pdf [file kgmi-06-02-1008336-s001.pdf]

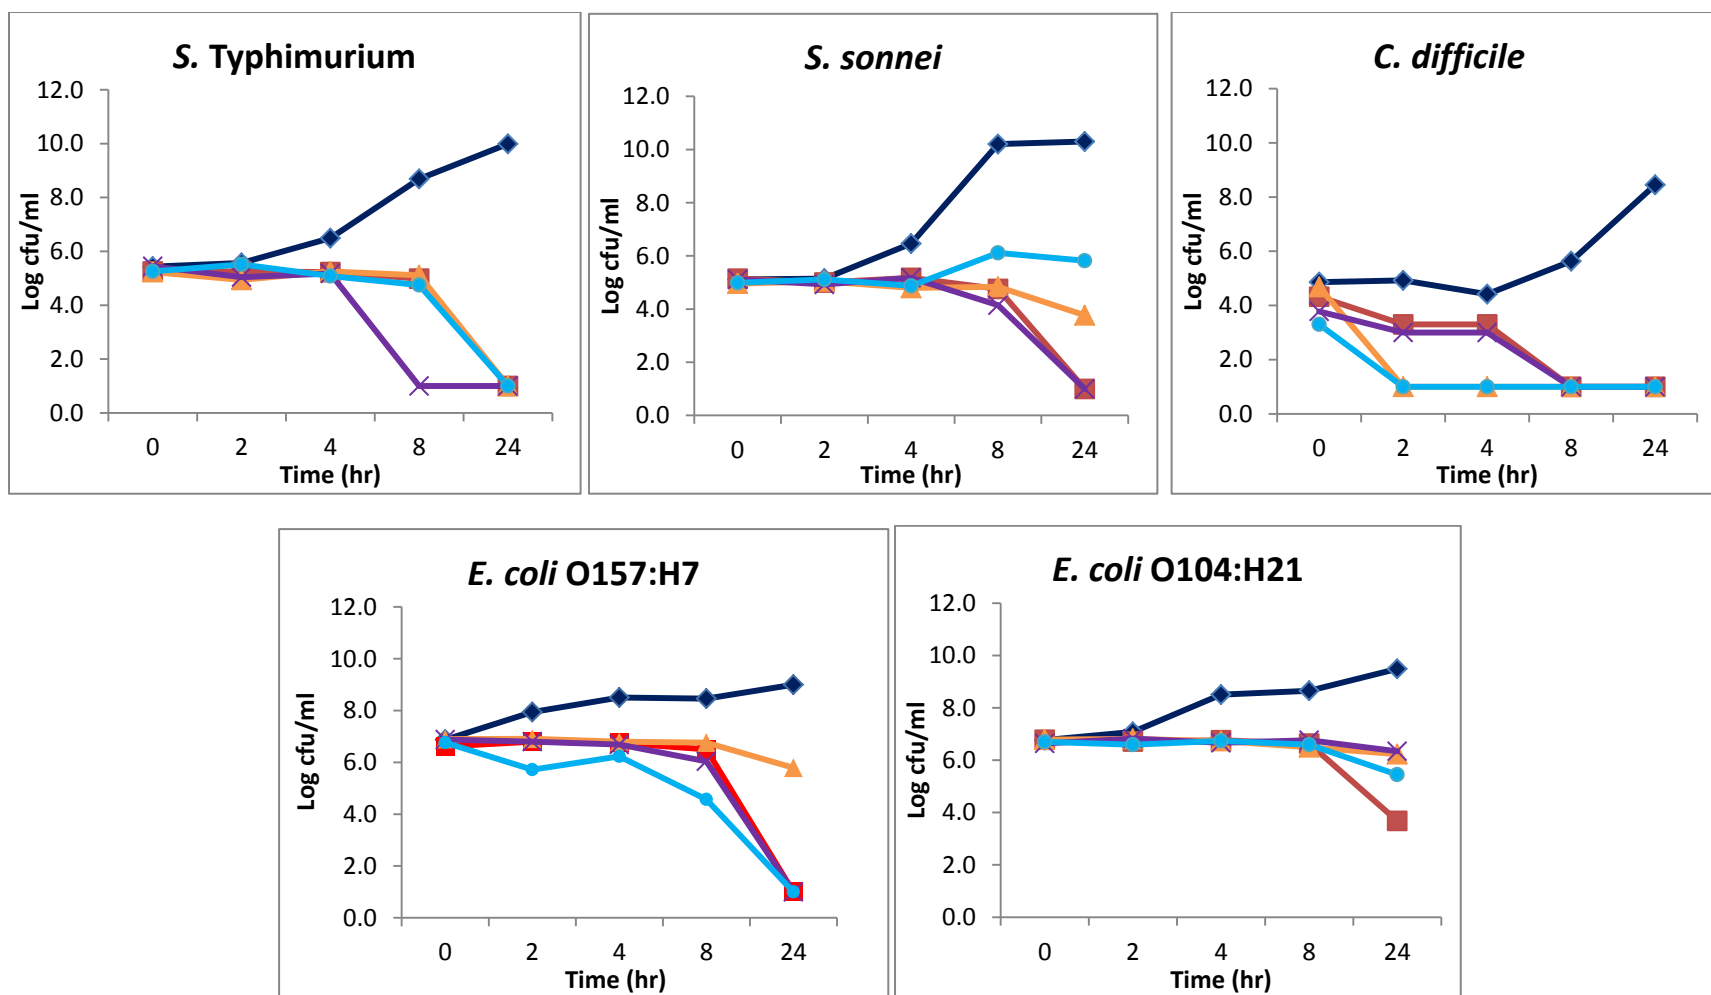

**Figure S1.** Results from the *in vitro* antibacterial assay with various gastrointestinal pathogens are depicted as log cfu/ml for untreated and treated bacteria over a 24 hour period. All bismuth treatments were tested at 35 mg/ml. (◆) Control; (■) BSS; (▲) BiOCl; (×) BSS+Vehicle; (●) BiOCl+Vehicle

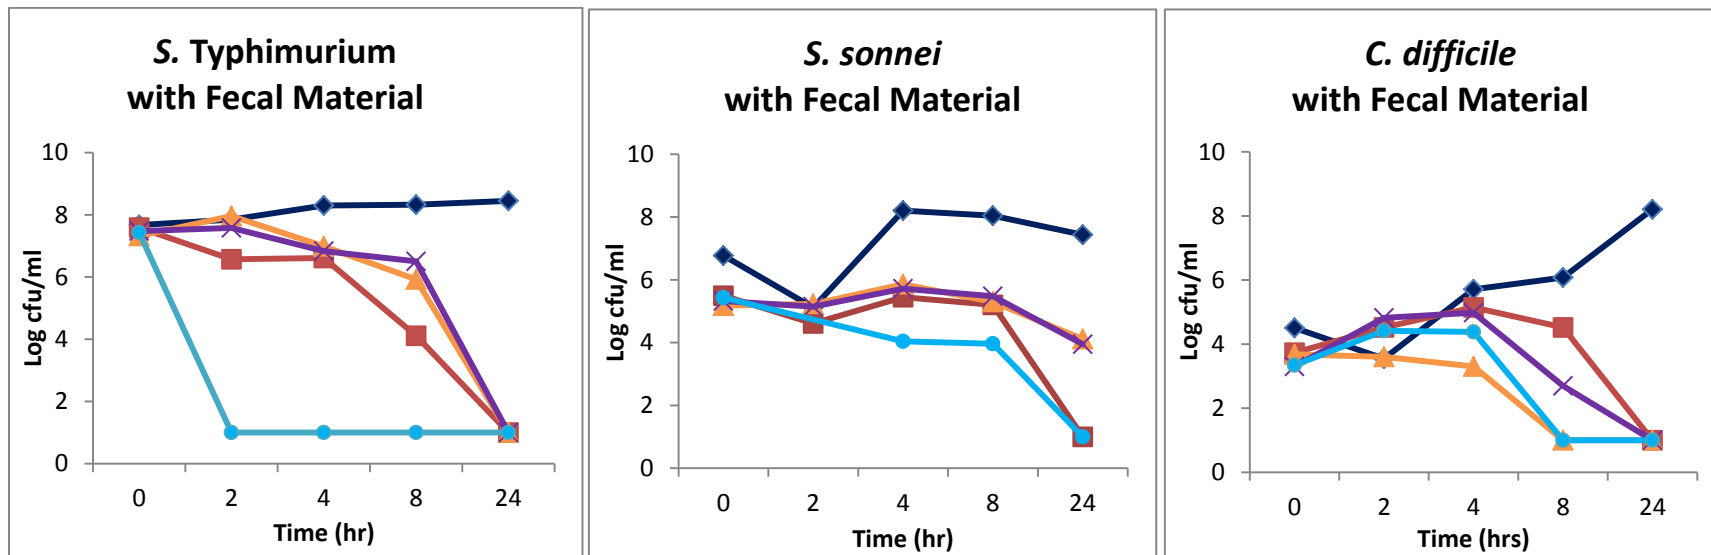

**Figure S2.** Results from the *in vitro* antibacterial assay with enteric pathogens in the presence of fecal material are depicted as log cfu/ml for untreated and treated bacteria over a 24 hour period. All bismuth treatments were tested at 35 mg/ml. (◆) Control; (■) BSS; (▲) BiOCl; (×) BSS+Vehicle; (●) BiOCl+Vehicle

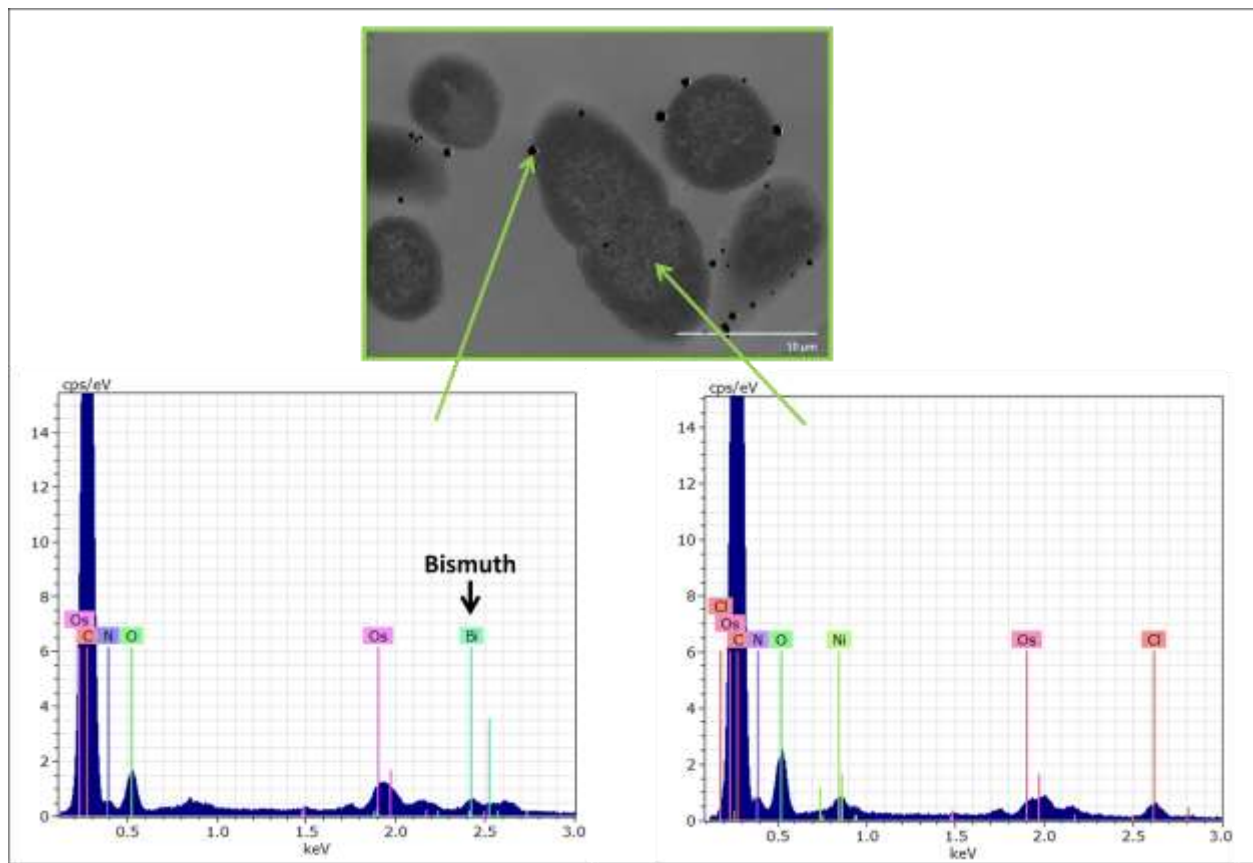

**Figure S3.** EDS histograms illustrate that a peak identified as bismuth appears when analyzing an individual dark particle whereas that same peak is absent when analyzing a random area of the bacterial cell with no dark particles present.
